# Supplementary material
Source: PubMed Central journal article supplement (PMC6126992)
Supplement: NIHMS960448-supplement-supplement_1.pdf [file NIHMS960448-supplement-supplement_1.pdf]

## METHODS

### Preparation of knob protein

Plasmid constructs (pRSET A; Life Technologies) that produce knob protein were transformed into BL21(DE3)pLysS competent bacteria (Life Technologies) and grown in LB supplemented with 100  $\mu$ g of ampicillin (Sigma-Aldrich) and 25  $\mu$ g/mL chloramphenicol (Sigma-Aldrich). Transformants were induced with 0.4 mmol/L isopropyl- $\beta$ -D-thiogalactopyranoside (Promega, Madison, Wis) for 12 hours at 37°C to induce recombinant knob protein. Recombinant knob protein was purified from cell lysates by using cOmplete His-Tag Purification Resin (Roche Life Sciences, Indianapolis, Ind) and passed through Detoxi-Gel Endotoxin Removing Gel (Thermo Fisher Scientific), according to the manufacturer's instructions. Residual endotoxin content was determined by using Limulus Amebocyte Lysate PYROGENT Plus (sensitivity = 0.06 EU/mL; Lonza, Walkersville, Md) and found to be less than detectable levels.

### Conditions for qPCR

qPCR was performed with iTaq Universal SYBR Green Supermix 200 (Bio-Rad Laboratories). The reaction was carried out in an iQ 5 Multicolor Real-Time PCR Detection System (Bio-Rad Laboratories). The relative amount of target mRNA was calculated based on its threshold cycle, as suggested by the software (iQ 5 Optical System software), in comparison with the threshold cycle of the housekeeping gene  $\beta$ -actin. After denaturation, conditions for gene expression were as follows: 50 cycles of 30 seconds at 95°C followed by 30 seconds at 60°C each cycle for most genes. For murine *Tslp*, 60 cycles of amplification with 30 seconds at 95°C followed by 30 seconds at 54°C each cycle were performed; for murine *Il25*, 60 cycles with 30 seconds at 92°C followed by 30 seconds at 52°C each cycle were performed; and for murine *Il33*, 55 cycles with 30 seconds at 92°C followed by 30 seconds at 56°C each cycle were performed.

### Immunohistology

For all immunohistologic analysis, tissue sections were subjected to antigen retrieval, followed by quenching of endogenous peroxidase activity before staining with specific antibodies. Sections were briefly counterstained (for 5 seconds) with hematoxylin. Appropriate VECTASTAIN ABC Kits using biotinylated secondary antibodies (Vector Laboratories, Burlingame, Calif) and the Peroxidase AEC (3-amino-9-ethylcarbazole) substrate kit (Vector Laboratories) were used for detection. Stained slides were examined with a Nikon Microphot EPI-FL microscope (Nikon, Tokyo, Japan), and images were captured with an Olympus DP71 camera (Olympus, Center

Valley, Pa). For quantitation of eosinophils, MBP<sup>+</sup> cells in randomly selected nonoverlapping microscopic fields were counted at  $\times 400$  magnification ( $12 \pm 2$  fields per slide for OVA groups and 5 fields per slide for control groups). For quantitation of E-cadherin and occludin, positively stained areas in the epithelium of all similarly sized airways with total basement membrane length in the range of 550 to 650  $\mu$ m were quantitated for each mouse.

## REFERENCES

- E1. Sasaki O, Imamura M, Yamazumi Y, Harada H, Matsumoto T, Okunishi K, et al. Alendronate attenuates eosinophilic airway inflammation associated with suppression of Th2 cytokines, Th17 cytokines, and eotaxin-2. *J Immunol* 2013; 191:2879-89.
- E2. Severson EA, Kwon M, Hilgarth RS, Parkos CA, Nusrat A. Glycogen synthase kinase 3 (GSK-3) influences epithelial barrier function by regulating occludin, claudin-1 and E-cadherin expression. *Biochem Biophys Res Commun* 2010; 397:592-7.
- E3. Yamaguchi H, Kojima T, Ito T, Kimura Y, Imamura M, Son S, et al. Transcriptional control of tight junction proteins via a protein kinase C signal pathway in human telomerase reverse transcriptase-transfected human pancreatic duct epithelial cells. *Am J Pathol* 2010;177:698-712.
- E4. Kato Y, Yashiro M, Noda S, Tendo M, Kashiwagi S, Doi Y, et al. Establishment and characterization of a new hypoxia-resistant cancer cell line, OCUM-12/Hypo, derived from a scirrhous gastric carcinoma. *Br J Cancer* 2009;102:898-907.
- E5. Lee Y-C, Jogie-Brahim S, Lee D-Y, Han J, Harada A, Murphy LJ, et al. Insulin-like growth factor-binding protein-3 (IGFBP-3) blocks the effects of asthma by negatively regulating NF- $\kappa$ B signaling through IGFBP-3R-mediated activation of caspases. *J Biol Chem* 2011;286:17898-909.
- E6. Chen Z-G, Zhang T-T, Li H-T, Chen F-H, Zou X-L, Ji J-Z, et al. Neutralization of TSLP inhibits airway remodeling in a murine model of allergic asthma induced by chronic exposure to house dust mite. *PLoS One* 2013;8:e51268.
- E7. Zhao A, Urban JF, Sun R, Stiltz J, Morimoto M, Notari L, et al. Critical role of IL-25 in nematode infection-induced alterations in intestinal function. *J Immunol* 2010;185:6921-9.
- E8. Zaiss MM, Maslowski KM, Mosconi I, Guenat N, Marsland BJ, Harris NL. IL-1b suppresses innate IL-25 and IL-33 production and maintains helminth chronicity. *PLoS Pathog* 2013;9:e1003531.
- E9. Johnson RM. Murine oviduct epithelial cell cytokine responses to *Chlamydia muridarum* infection include interleukin-12-p70 secretion. *Infect Immun* 2004; 72:3951-60.
- E10. Otterdal K, Smith C, Oie E, Pedersen TM, Yndestad A, Stang E, et al. Platelet-derived LIGHT induces inflammatory responses in endothelial cells and monocytes. *Blood* 2006;108:928-35.
- E11. Ha S, Ge XN, Bahaie NS, Kang BN, Rao A, Rao SP, et al. ORMDL3 promotes eosinophil trafficking and activation via regulation of integrins and CD48. *Nat Commun* 2013;4:2479.

**TABLE E1.** List of primers

| Gene                   | Forward primer              | Reverse primer              | Reference |
|------------------------|-----------------------------|-----------------------------|-----------|
| Eotaxin-1 (mouse)      | AGAGCTCCACAGCGCTTCT         | GCAGGAAGTTGGGATGGAG         | E1        |
| Eotaxin-2 (mouse)      | GCAGCATCTGTCCAAGG           | GCAGCTTGGGGTCAGTACA         | E1        |
| E-cadherin (human)     | CCCAATAGATCTCCCTTCACAG      | CCACCTCTAAGGCCATCTTTG       | E2        |
| Occludin (human)       | TCAGGGAATATCCACCTATCACTTCAG | CATCAGCAGCAGCCATGTACTCTTCAC | E3        |
| ZO-1 (human)           | CGGTCCTCTGAGCCTGTAAG        | GGATCTACATGCGACGACAA        | E4        |
| ICAM-1 (human)         | CTGCAGACAGTGACCATC          | GTCCAGTTTCCCGGACAA          | E5        |
| TSLP (mouse)           | CGGATGGGGCTAACTTACA         | TCCTCGATTGCTCGAACTT         | E6        |
| IL-25 (mouse)          | CAGCAAAGAGCAAGAACC          | CCCTGTCCAACATCATAGC         | E7        |
| IL-33 (mouse)          | CAATCAGGCGACGGTGTGGATGG     | TCCGGAGGCGAGACGTCACC        | E8        |
| TARC (mouse)           | ATGAGGCACTTCAGATGCT         | ATGTTTGTCTTTGGGGTCTG        | E9        |
| $\beta$ -Actin (human) | AGGCACCAGGGCGTGAT           | TCGTCCCAGTTGGTGACGAT        | E10       |
| $\beta$ -Actin (mouse) | GGTCATCACTATTGGCAACG        | ACGGATGTCAACGTCACACT        | E11       |

*ICAM-1*, Intercellular adhesion molecule 1; *ZO-1*, zonula occludens 1.

**TABLE E2.** Effect of knob on cell viability

| <b>Treatment</b>                 | <b>Cell viability based on Trypan<br/>Blue exclusion (% mean <math>\pm</math> SEM)</b> |
|----------------------------------|----------------------------------------------------------------------------------------|
| Untreated (culture medium alone) | 98.08 $\pm$ 0.9                                                                        |
| Knob (0.25 $\mu$ g/mL)           | 94.38 $\pm$ 1.73                                                                       |
